# Supplementary material for: Supervision in der Ausbildung in Kinder- und Jugendlichenpsychotherapie
Source: Springer Nature journal article supplement (doi:10.1007/s00278-022-00603-z), 2022-06-21
Supplement: MOESM1 [file 23187926]

Online-Supplement zu „Supervision in der Ausbildung in Kinder- und Jugendlichenpsychotherapie (Daniela Schwarz, Tina In-Albon), Die Psychotherapie 06/2022

**Tabelle 4** Pearson-Korrelation der Häufigkeit und wahrgenommenen Nützlichkeit der Supervisionsthemen und Nutzen von Videos

|  | Häufigkeit und Nützlichkeit | |
| --- | --- | --- |
|  | r | 95% CI |
| SV- Inhalte |  |  |
| 1 | .56*** | [0.48,0.63] |
| 2 | .51*** | [0.42,0.58] |
| 3 | .46*** | [0.37,0.54] |
| 4 | .43*** | [0.33,0.51] |
| 5 | .45*** | [0.36,0.54] |
| 6 | .47*** | [0.38,0.55] |
| 7 | .54*** | [0.46,0.61] |
| 8 | .49*** | [0.40,0.56] |
| 9 | .47*** | [0.38,0.56] |
| 10 | .53*** | [0.44,0.60] |
| 11 | .48*** | [0.39,0.56] |
| 12 | .36*** | [0.27,0.45] |
| SV-Methode |  |  |
| 13. | .42*** | [0.32,0.51] |

*Anmerkung.* Die Korrelationen sind dargestellt für die folgenden SV-Inhalte:
1. Anwendung therapeutischer Methoden, 2. Therapeuten-Klient-Beziehung und deren Veränderungsmöglichkeiten, 3. Kontext bzw. Rahmenbedingungen der Therapie, 4. therapeutische Kompetenzen, 5. Einfluss eigener Anteile auf das Therapiegeschehen, 6. Eigene Gefühle im Rahmen der Therapie, 7. Diagnostik/ Differentialdiagnostik, 8. Umgang mit der Symptomatik der Patienten, 9. Ethische/ rechtliche Aspekte, 10. Therapeut-Bezugsperson-Beziehung und deren Veränderungsmöglichkeiten, 11. Verbesserung der Interaktion/ Beziehung von Patient-Bezugsperson, 12. Therapieantrag/ Epikrise, 13. Videos. *r* = Pearson-Korrelation. *p-*Adjustierung nach Holm. *****p<.001
